# Supplementary material for: Amygdala and Nucleus Accumbens Activation Predict Treatment Decisions in Knee Osteoarthritis: An fMRI Study Comparing TKR and Conservative Management
Source: Research Square preprint supplement (doi:10.21203/rs.3.rs-8325651/v1), 2026-01-01

**Supplementary Table 1.** List of patient eligibility criteria.

| **Inclusion criteria** | **Exclusion criteria** |
| --- | --- |
| - Fulfilment of the American College of Rheumatology (ACR) classification criteria for clinical Knee OA. - Aged between 60 and 70 years. - Knee radiography (performed in the previous 12 months) graded 2 or 3 according to Kellgren and Lawrence (KL) scale. - Presence of symptomatology (pain, dysfunction and/or effusion) in the last 3 months. - Ability to provide written informed consent. | - OA presence exclusively in either the lateral femorotibial or the patellofemoral compartments. - Presence of secondary OA:   - Partial or total meniscectomy.   - Inflammatory or connective tissue diseases.   - Overuse of the joint from work or sporting activities.   - Pathological varus or valgus deformity.   - Presence of microcrystals in the articular space. - Fibromyalgia. - Underlying uncompensated health condition. - Need for assistance or support to walk (crutch, walker). - MRI contraindications. - Use of the following OA treatments in the indicated period previous to the clinical visits:   - NSAIDs: 1 week.   - Morphics: 1 week.   - Corticosteroids: 1 month.   - SYSADOA: 2 months.   - Intraarticular hyaluronic acid: 3 months. - Abuse substances use in the 6 months prior to the study |

**Supplementary Table 2.** Statistical power analysis for detecting amygdala and nucleus accumbens activation differences, with an alpha level of 0.05 in a two-tailed test and sample sizes of 20 and 11 participants respectively.

|  | *Statistical power* | *SD* | *Mean CM group* | *Mean TKR group* |
| --- | --- | --- | --- | --- |
| Amygdala_Left | 87% | 0.509 | -0.328 | 0.260 |
| Amygdala_Right | 90% | 0.385 | -0.396 | 0.069 |
| Nucleus accumbens_Left | 8% | 0.332 | -0.001 | 0.061 |
| Nucleus accumbens_Right | 3% | 0.341 | 0.054 | 0.052 |

CM, conservative management; TKR: Total knee replacement; SD: standard desviation.

| **Supplementary Table 3.** Sex and age differences in activation patterns during pressure stimulation. | | | | | | |
| --- | --- | --- | --- | --- | --- | --- |
|  | ***Cluster-level*** | | | ***Peak-level*** | | |
|  | ***Voxels*** | ***PFWE-corr*** | | ***x y z*** | ***t-value*** | ***p-value*** |
| **Sex (women > men)** |  | |  |  |  |  |
| **Knee interline** |  |  | |  |  |  |
| Right occipital cortex | 3327 | <0.001 | | 21 -85 22 | 5.6 | <0.001 |
| Left occipital cortex | sc | sc | | -21 -85 22 | 4.6 | <0.001 |
| Cerebellum | sc | sc | | 12 -64 -29 | 4.4 | <0.001 |
| **Tibial surface** |  |  | |  |  |  |
| Motor cortex | 450 | 0.010 | | -42 -7 61 | 5.3 | <0.001 |
| Cerebellum | 493 | 0.007 | | 33 -61 -23 | 4.1 | <0.001 |
| **Age (positive correlation)** |  |  | |  |  |  |
| **Knee interline** |  |  | |  |  |  |
| Posterior cingulate cortex | 464 | 0.008 | | 0 -49 19 | 4.9 | <0.001 |
| x y z, coordinates given in Montreal Neurological Institute (MNI) space. Statistics correspond to a corrected threshold PFWE (*PFWE-corr)* < 0.05 estimated using SPM. sc: same cluster. | | | | | | |

**Supplementary Figure 1.** Sex differences in brain activation during pressure stimulation. Figure illustrates regions where women participants showed increased activation relative to men. A, knee interline; B, tibial surface. Color bars represent t-values.


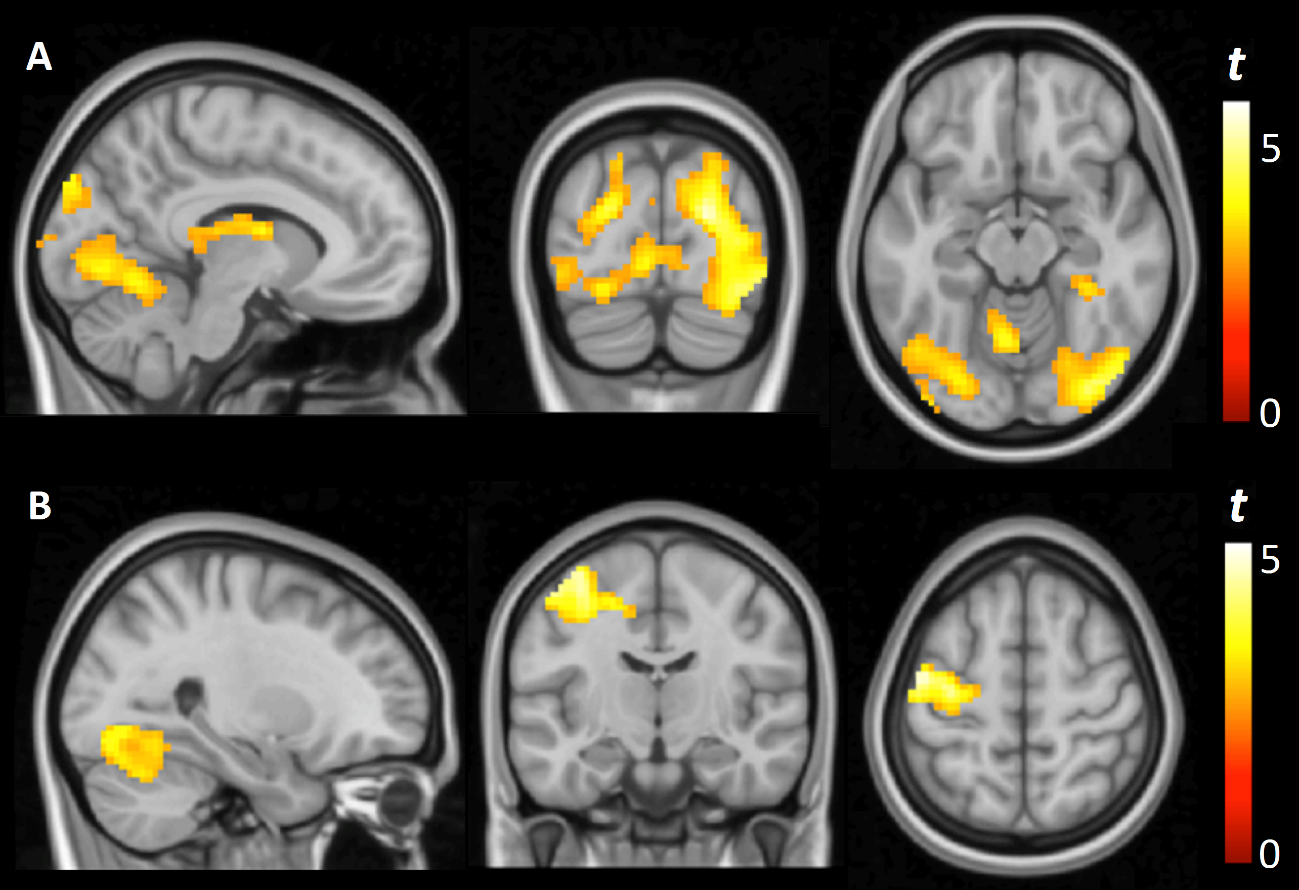


**Supplementary Figure 2.** Age-related effects on brain activation during knee interline pressure stimulation. Figure illustrates the brain region where activation increases with age across participants. Color bar represents t-values.


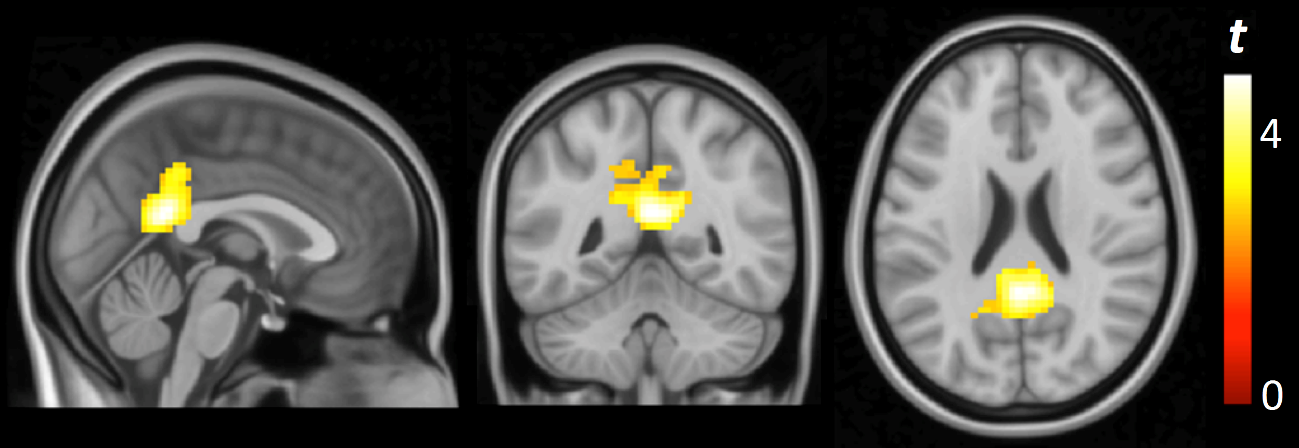

Supplement: Supplementary file 1 [file 644b3da06aae7e2123998576.docx]
